# Supplementary figures and images for: Adipocyte progenitor cells initiate monocyte chemoattractant protein-1-mediated macrophage accumulation in visceral adipose tissue
Source: PubMed Central journal article supplement — Mol Metab. 2015 Aug 12;4(11):779–94. doi: 10.1016/j.molmet.2015.07.010 (PMC4632113; doi:10.1016/j.molmet.2015.07.010), 2015-08-12

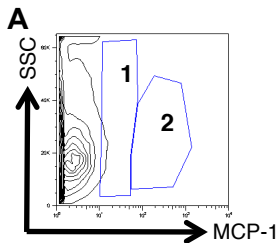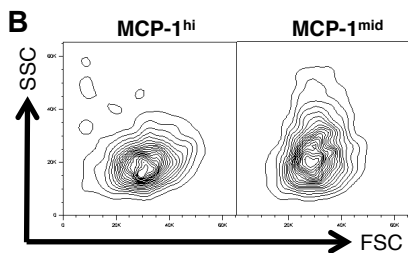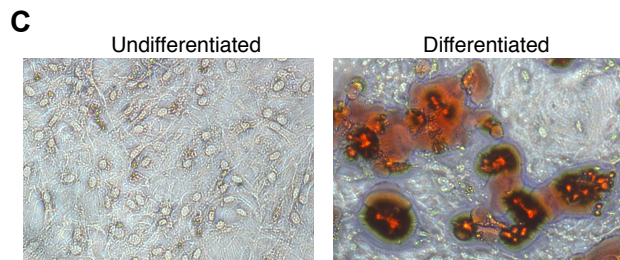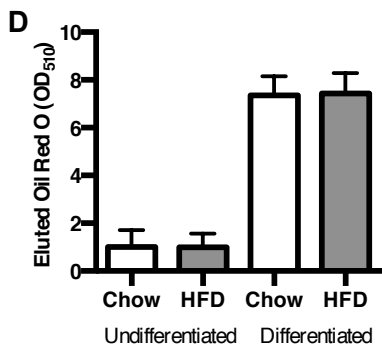

Supplement: mmc1.pdf [file mmc1.pdf]

**A**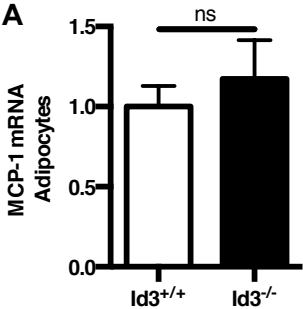**B**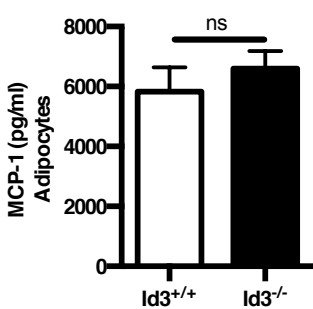

Supplement: mmc2.pdf [file mmc2.pdf]

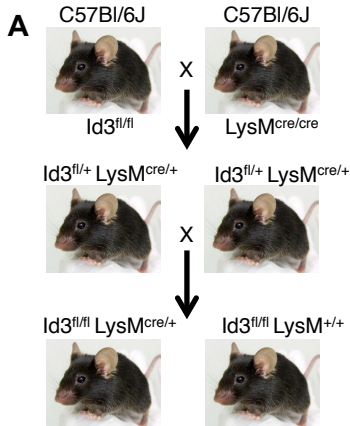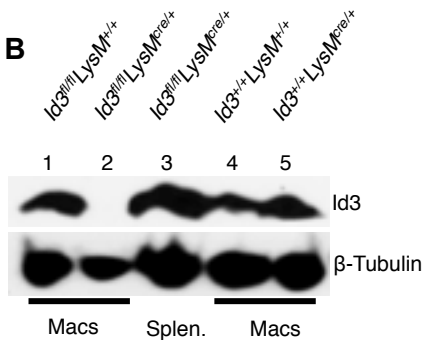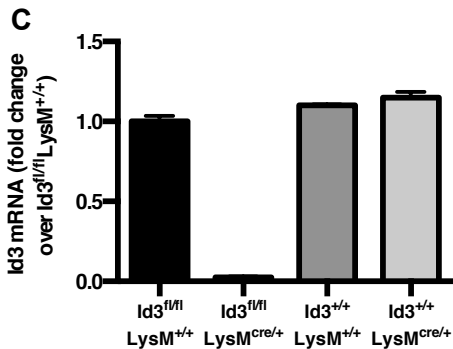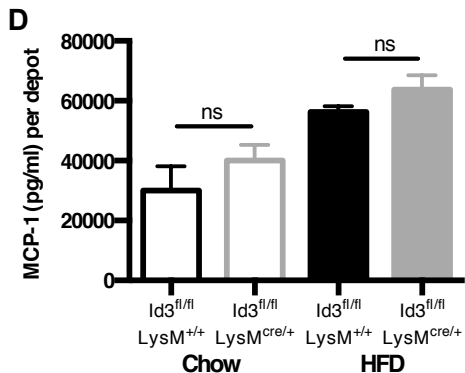

Supplement: mmc3.pdf [file mmc3.pdf]

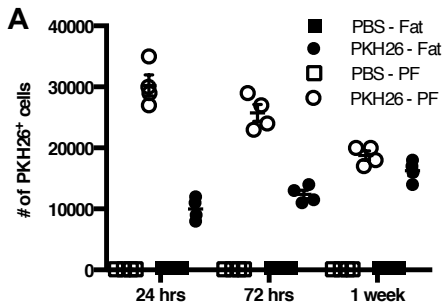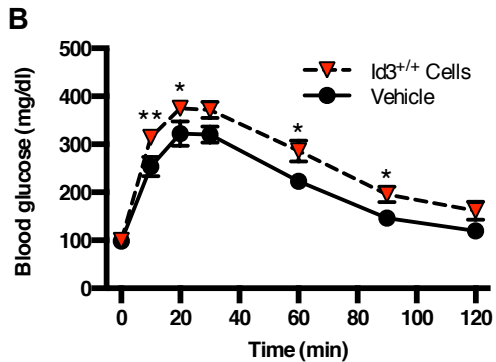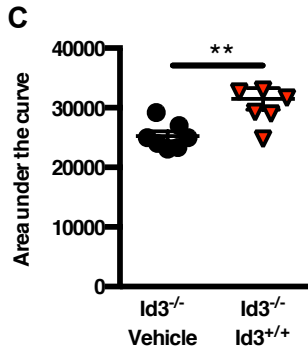

Supplement: mmc4.pdf [file mmc4.pdf]

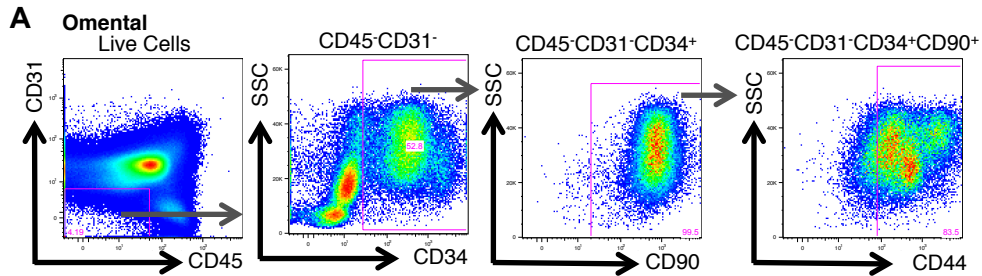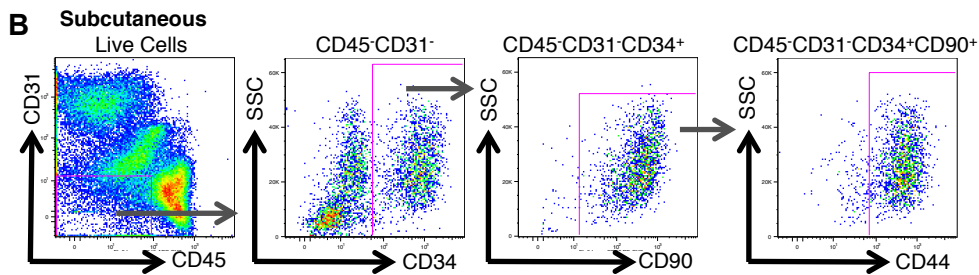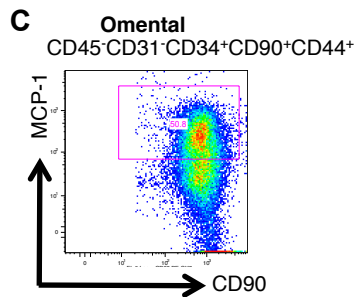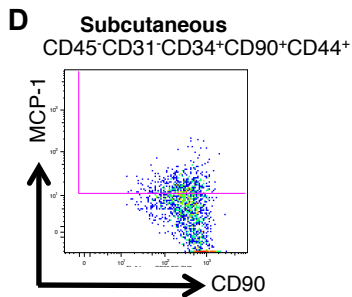

Supplement: mmc5.pdf [file mmc5.pdf]
